# Supplementary material
Source: publisher site journal article supplement (https://www.dovepress.com/article/575632)

**Supplementary File**

**Supplementary Figure 1.** Kaplan–Meier survival curve showing composite macrovascular complications stratified by the duration of insulin initiation


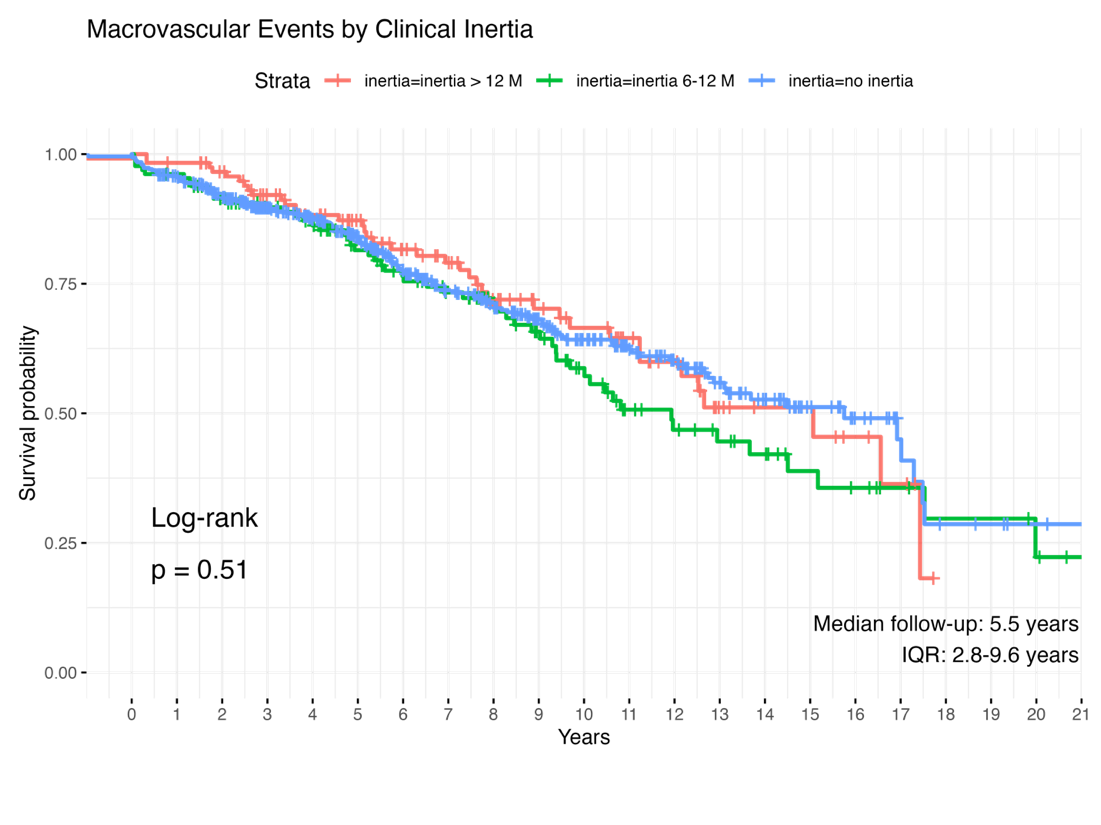


IQR, interquartile range

**Supplementary Figure 2.** Kaplan–Meier survival curve showing composite microvascular complications stratified by the duration of insulin initiation


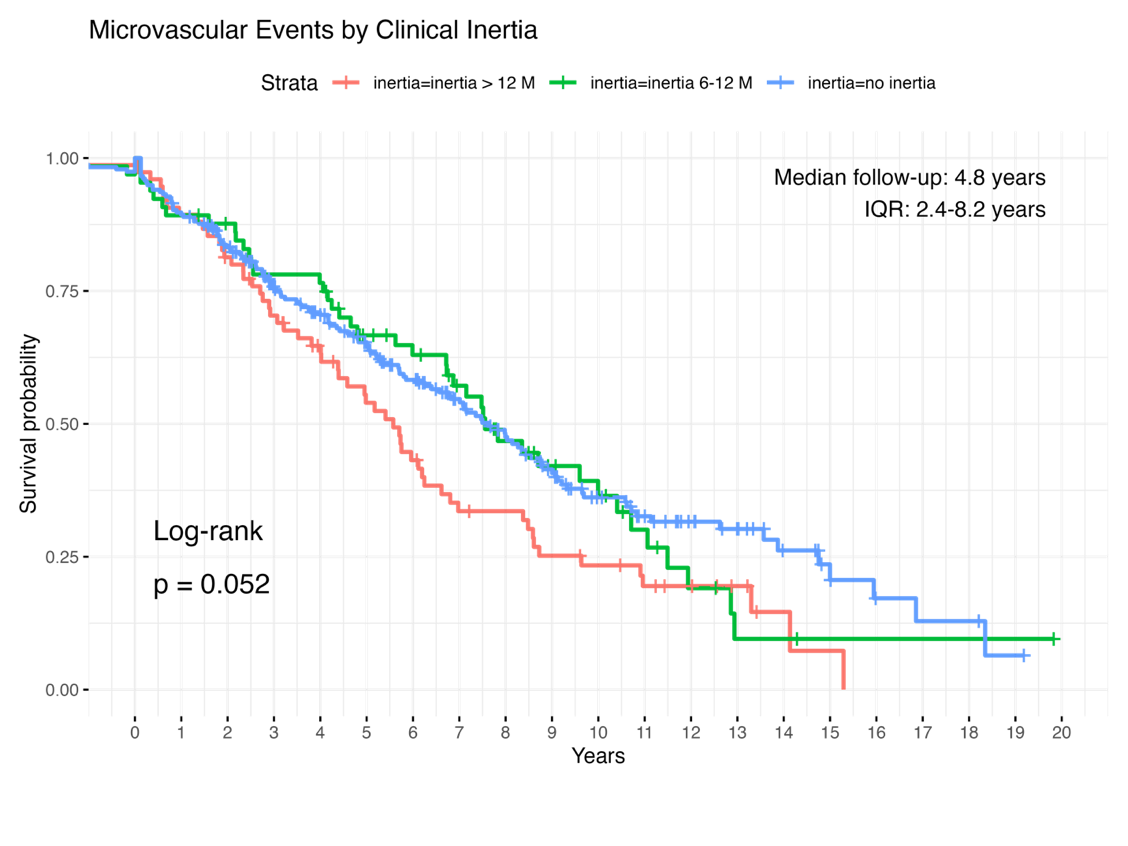


IQR, interquartile range

**Supplementary Figure 3.** Kaplan–Meier survival curve showing the occurrence of ischemic heart disease stratified by clinical inertia


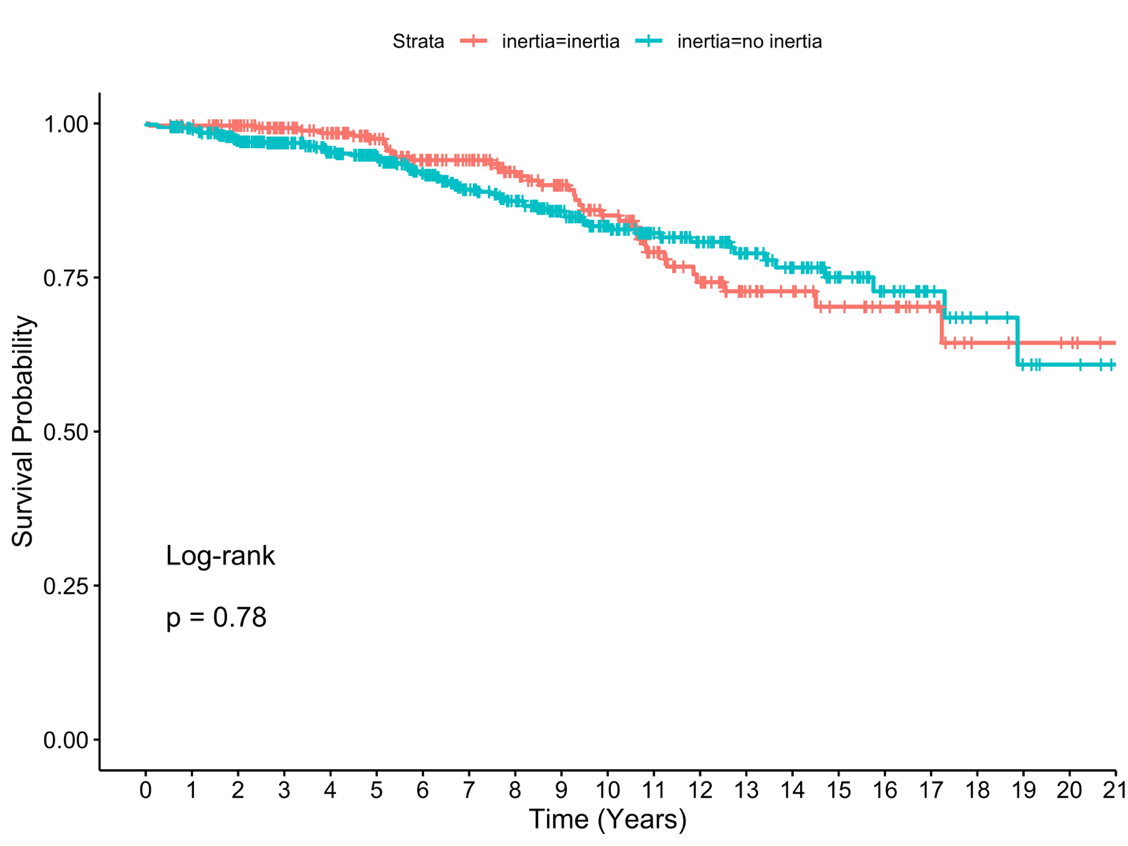


**Supplementary Figure 4.** Kaplan–Meier survival curve showing the occurrence of heart failure stratified by clinical inertia


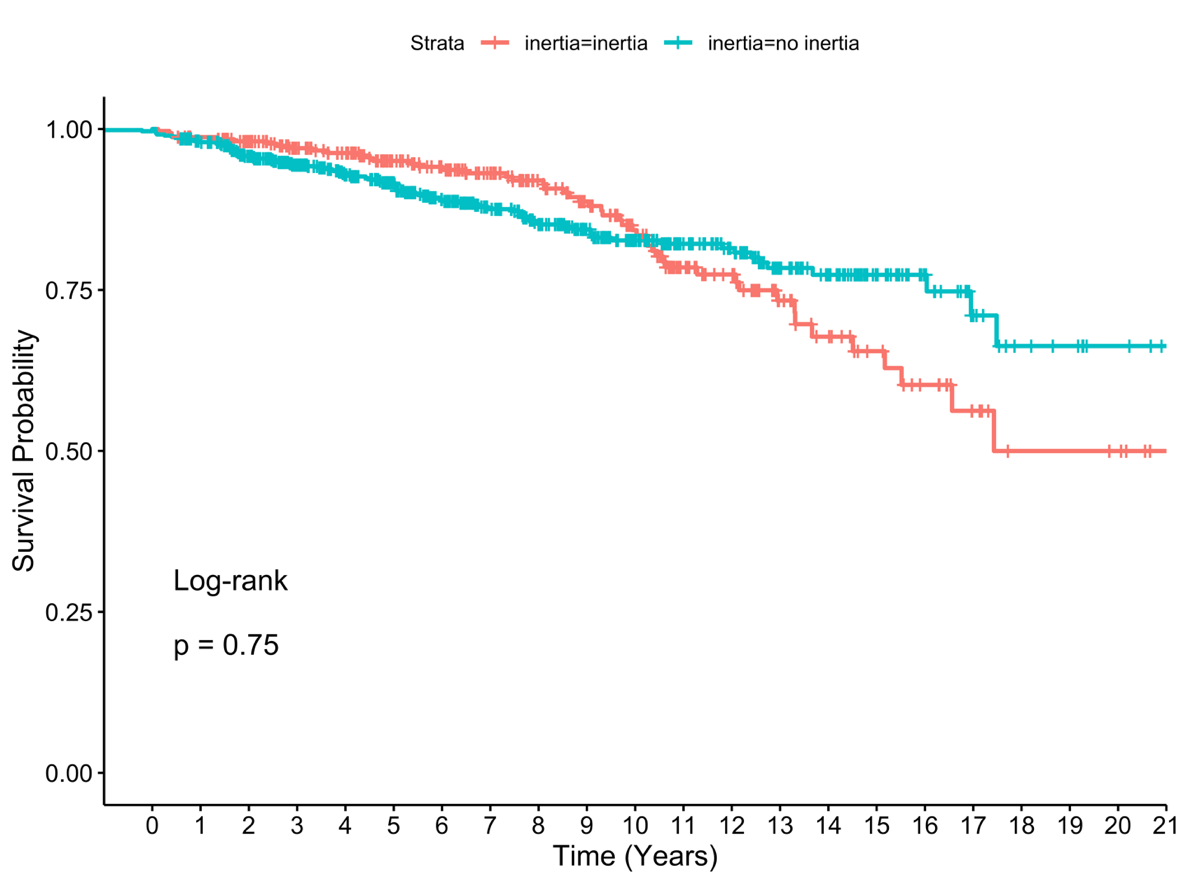


**Supplementary Figure 5.** Kaplan–Meier survival curve showing the occurrence of ischemic stroke stratified by clinical inertia


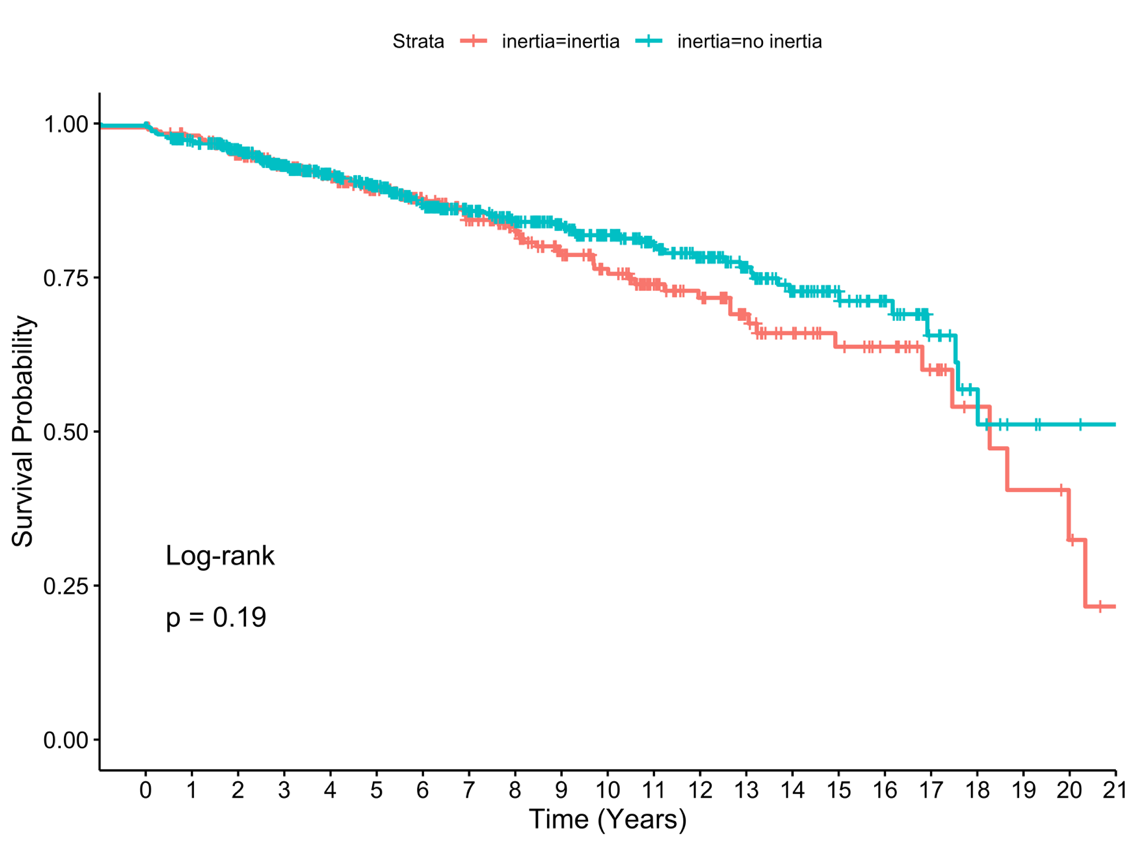


**Supplementary Figure 6.** Kaplan–Meier survival curve showing the occurrence of peripheral artery disease stratified by clinical inertia


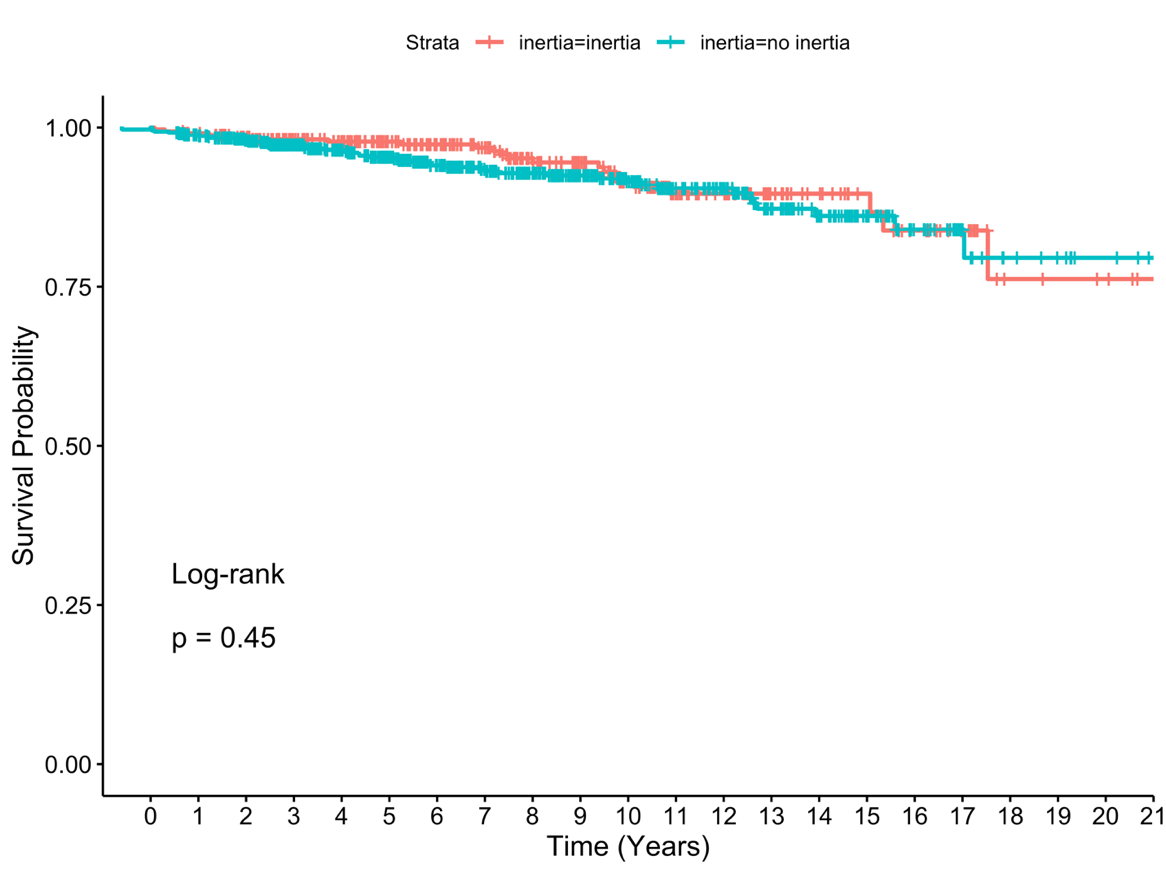


**Supplementary Figure 7.** Kaplan–Meier survival curve showing the occurrence of diabetic retinopathy stratified by clinical inertia


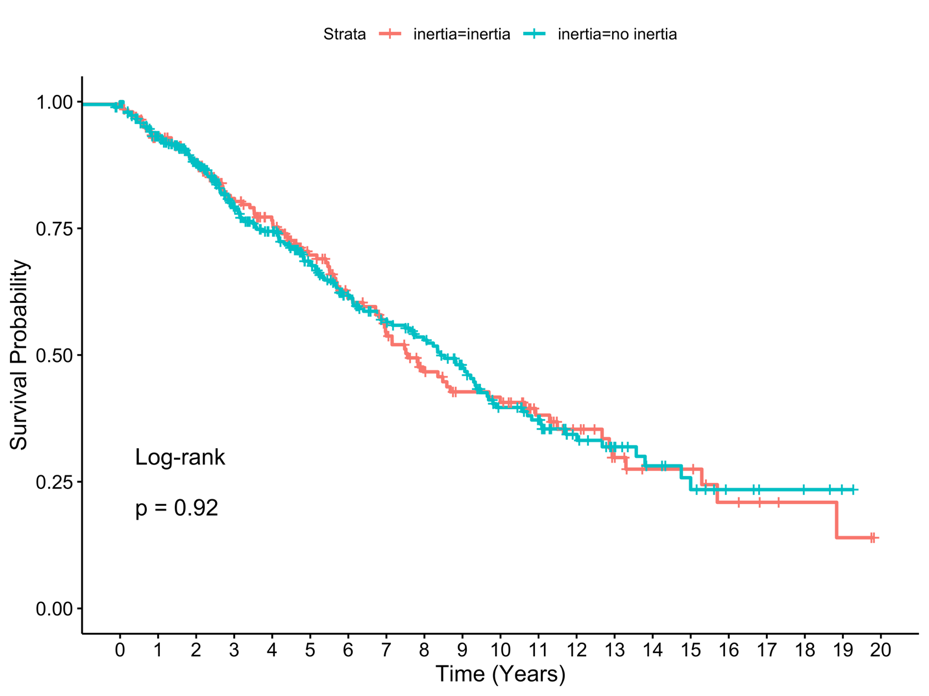


**Supplementary Figure 8.** Kaplan–Meier survival curve showing the occurrence of diabetic neuropathy stratified by inertia group


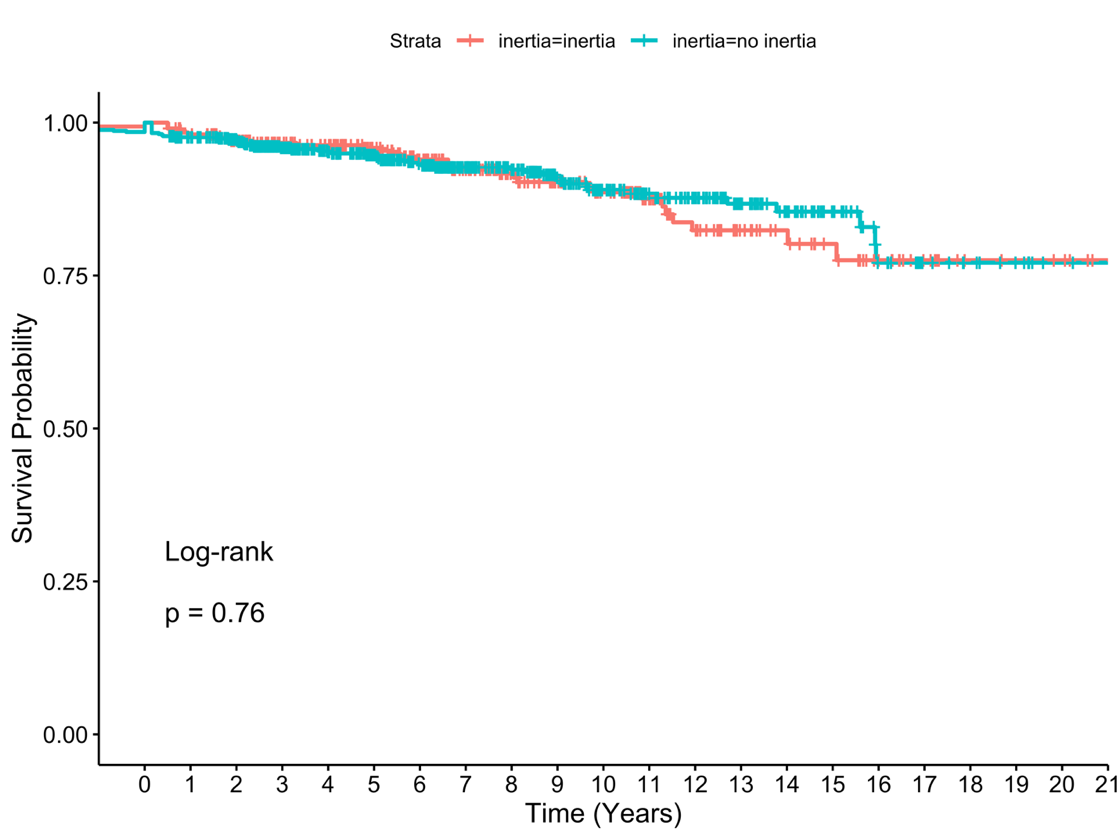


**Supplementary Figure 9.** Kaplan–Meier survival curve showing the occurrence of diabetic nephropathy stratified by clinical inertia


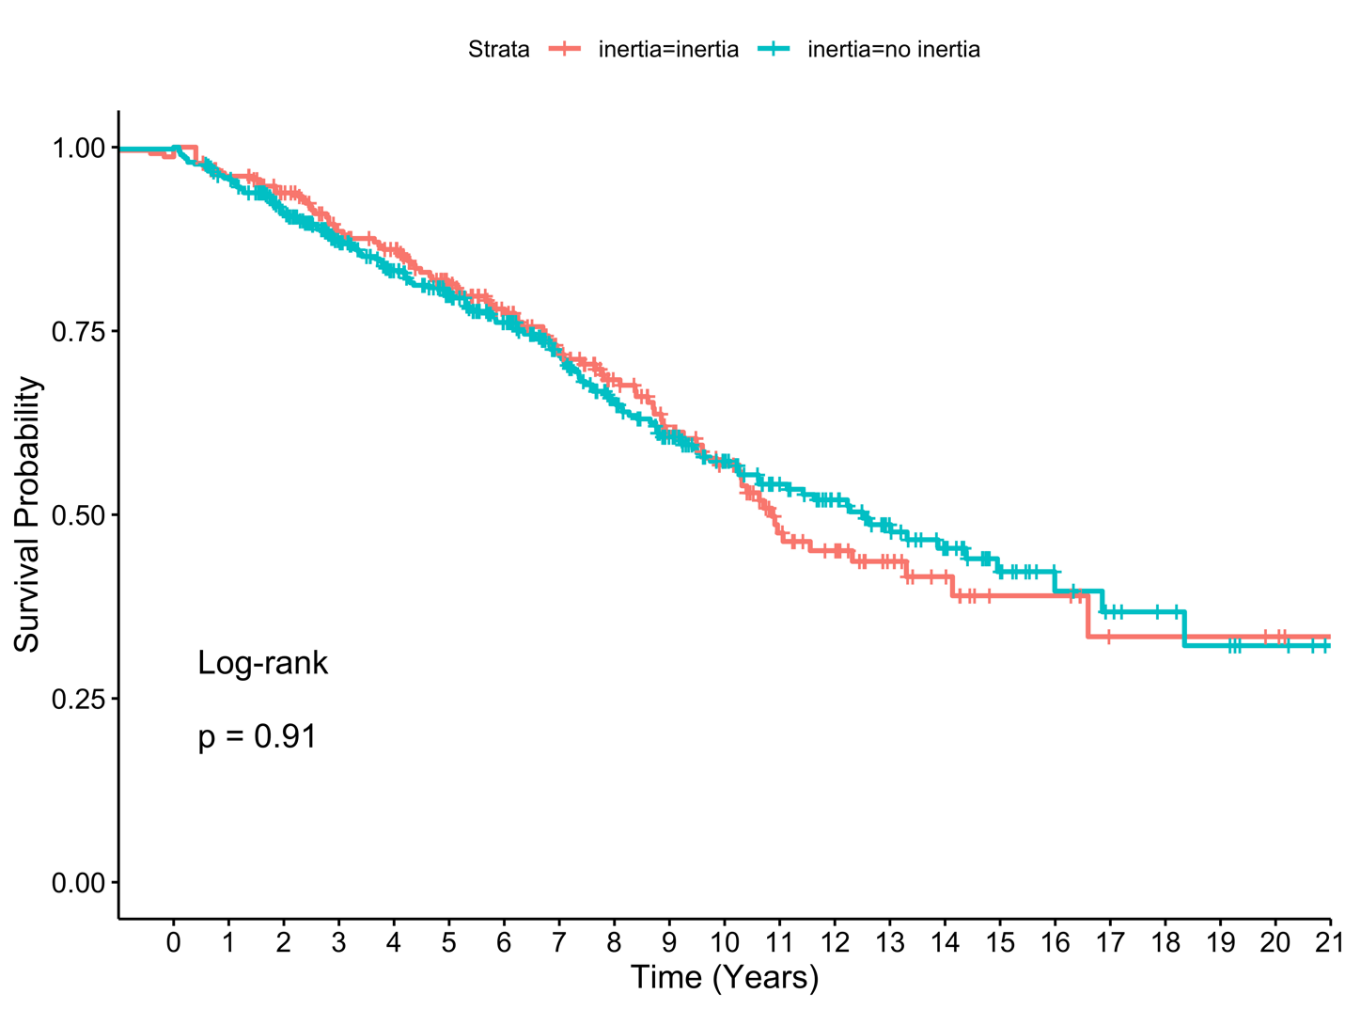

Supplement: Supplementary file 1 [file 575632%20Revised%20Supplementary%20Material.docx]
